# Supplementary material for: Spatiotemporal responses of runoff to climate change in the southern Tibetan Plateau
Source: Copernicus journal article supplement (doi:10.5194/hess-28-4361-2024), 2024-09-25
Supplement: Supplementary file 1 [file hess-28-4361-2024-supplement.pdf]

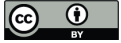

*Supplement of*

## **Spatiotemporal responses of runoff to climate change in the southern Tibetan Plateau**

**He Sun et al.**

*Correspondence to:* He Sun (sunhe@itpcas.ac.cn) and Fengge Su (fgsu@itpcas.ac.cn)

The copyright of individual parts of the supplement might differ from the article licence.

## Contents of this file

Text S1. Teleconnection Indices

Figures S1 to S16

Tables S1 to S5

### Captions:

|                                                                                                                                                                                                                                                                                                                                                                                                                                                                                             |    |
|---------------------------------------------------------------------------------------------------------------------------------------------------------------------------------------------------------------------------------------------------------------------------------------------------------------------------------------------------------------------------------------------------------------------------------------------------------------------------------------------|----|
| <b>Text S1.</b> Teleconnection Indices .....                                                                                                                                                                                                                                                                                                                                                                                                                                                | 6  |
| <b>Figure S1.</b> Mean monthly precipitation, temperature, and simulated total runoff in the YZ and its sub-basins for 1971–2020. ....                                                                                                                                                                                                                                                                                                                                                      | 7  |
| <b>Figure S2.</b> Annual time series of observed and simulated glacier mass balance at (a) Gurenhekou for 2005–2009 and (b) Parlung No.94 for 2006–2018 ( <a href="http://www.tpsc.ac.cn">http://www.tpsc.ac.cn</a> ), and (c) mean annual glacier coverage (%) from the RGI V6.0 during 2000–2010 from the VIC-Glacier model simulation and satellite-based observations over the entire YZ basin and its sub-basins. The number of each figure is calculated with actual magnitudes. .... | 8  |
| <b>Figure S3.</b> Mean monthly observed and simulated runoff at eight hydrological stations of sub-basins in the YZ for 1971–2015 (1981–2000 for YG, 2004–2013 for BM and 2020 for MT). Abbreviations LZ, RKZ, LS, LZ-YC, YC-NX, NX, YG and BM represent the upstream basins of Lhatse, Shigatse, Lhasa, the regions between Lhatse and Yangcun, between Yangcun and Nuxia, Nuxia, Yigong and Bomi, respectively. The number of each figure is calculated with actual magnitudes. ....      | 9  |
| <b>Figure S4.</b> Monthly time series of snow cover fraction (%) from the VIC-Glacier model simulation and satellite-based MODIS observations across the entire YZ basin and its four sub-basins for the period 2001–2019. The asterisk indicates a 95% significance confidence level ( $p < 0.05$ ). ....                                                                                                                                                                                  | 10 |

**Figure S5.** Annual variations in precipitation, temperature, total runoff, and the three runoff components (rainfall, glacier, and snowmelt runoff) in the LZ sub-basin for 1971–2020, respectively. .... 11

**Figure S6.** Annual variations in precipitation, temperature, total runoff, and the three runoff components (rainfall, glacier, and snowmelt runoff) in the RKZ sub-basin for 1971–2020, respectively..... 12

**Figure S7.** Annual variations in precipitation, temperature, total runoff, and the three runoff components (rainfall, glacier, and snowmelt runoff) in the LS sub-basin for 1971–2020, respectively. .... 13

**Figure S8.** Annual variations in precipitation, temperature, total runoff, and the three runoff components (rainfall, glacier, and snowmelt runoff) in the LZ-YC sub-basin for 1971–2020, respectively..... 14

**Figure S9.** Annual variations in precipitation, temperature, total runoff, and the three runoff components (rainfall, glacier, and snowmelt runoff) in the YC-NX sub-basin for 1971–2020, respectively..... 15

**Figure S10.** Annual variations in precipitation, temperature, total runoff, and the three runoff components (rainfall, glacier, and snowmelt runoff) in the YZ and its sub-basins for 1971–2020, respectively. Linear trends are indicated by dashed lines, and corresponding values are also indicated. Tendency results for sub-basins are shown in the inset table. The number of each figure are calculated with actual magnitudes. Asterisks indicate the 95% significance level..... 16

**Figure S11.** Annual correlation between total runoff and precipitation, temperature, and the three runoff components (rainfall, glacier, and snowmelt runoff) in the YZ basin and its sub-basins for 1971–2020, respectively. Asterisks indicate a 95% significance level. .... 17

|                                                                                                                                                                                                                                                                                                                                                                                                  |    |
|--------------------------------------------------------------------------------------------------------------------------------------------------------------------------------------------------------------------------------------------------------------------------------------------------------------------------------------------------------------------------------------------------|----|
| <b>Figure S12.</b> Annual time series of snow days in the YZ basin for 1971–2020.....                                                                                                                                                                                                                                                                                                            | 18 |
| <b>Figure S13.</b> Correlations between 10 teleconnection indices and annual precipitation in the YZ basin and its NX and NX-BXK sub-basins (a–c) for 1971–2020. Annual time series of normalized precipitation, ENSO, AMO and PDO in the NX sub-basin (d), and normalized precipitation and EASM in the NX-BXK sub-basin (e) for 1971–2020. Asterisks indicate the 95% significance level. .... | 19 |
| <b>Figure S14.</b> Seasonal correlations between four teleconnection indices and annual precipitation in the YZ basin and its NX and NX-BXK sub-basins. Asterisks indicate the 95% significance level. .                                                                                                                                                                                         | 20 |
| <b>Figure S15.</b> Annual variations of precipitation, total runoff, and evaporation in the RKZ sub-basin before and after 1997, respectively. ....                                                                                                                                                                                                                                              | 21 |
| <b>Figure S16.</b> (a) Annual variations in contribution of rainfall runoff, snowmelt, glacier runoff and baseflow to total runoff in the YZ basin for 1971–2020. (b) Mean annual contribution of rainfall runoff, snowmelt, glacier runoff and baseflow to total runoff. ....                                                                                                                   | 22 |
| <b>Table S1.</b> List of data used in this study for the VIC-Glacier model validation. ....                                                                                                                                                                                                                                                                                                      | 23 |
| <b>Table S2.</b> Changes in mean seasonal precipitation (%), temperature (°C), total runoff, and the three components (%), along with their contributions to total runoff (%) in 1998–2020 relative to the period 1971–1997 in the entire YZ basin and its NX and NX-BXK sub-basins. ....                                                                                                        | 24 |
| <b>Table S3.</b> Projected changes (%) in mean annual and seasonal total runoff and its three components (rainfall, snowmelt and glacier) in 2021–2050 and 2071–2100, respectively, relative to 1971–2000 under the two SSPs in the YZ basin and its two sub-basins. The uncertainties are indicated with one standard deviation. ....                                                           | 26 |
| <b>Table S4.</b> Projected changes (%) in mean annual and seasonal precipitation in 2021–2050 and 2071–2100, respectively, relative to 1971–2000 under the two SSPs in the YZ basin and its two sub-                                                                                                                                                                                             |    |

basins. The uncertainties are indicated with one standard deviation. ....28

Table S5. Projected changes (°C) in mean annual and seasonal temperature in 2021–2050 and 2071–2100, respectively, relative to 1971–2000 under the two SSPs in the YZ basin and its two sub-basins. The uncertainties are indicated with one standard deviation. .... 30

## **Text S1. Teleconnection Indices**

The monthly vertical integrated atmospheric moisture fluxes derived from the ERA5 data and ten teleconnection indices for 1971–2020 were used to examine the factors contributing to runoff changes in the YZ basin. These indices included the Arctic Oscillation (AO, <https://www.cpc.ncep.noaa.gov/products/precip/CWlink/MJO/climwx.shtml>), East Asian Summer Monsoon Index (EASM, <http://data.tpsc.ac.cn/>), El Niño/Southern Oscillation (ENSO, <https://www.psl.noaa.gov/enso/mei>), North Atlantic Oscillation (NAO, <https://www.cpc.ncep.noaa.gov/products/precip/CWlink/MJO/climwx.shtml>), Atlantic Multidecadal Oscillation (AMO, <http://www.psl.noaa.gov/data/timeseries/AMO/>), Pacific Decadal Oscillation (PDO, [http://research.jisao.washington.edu/data\\_sets/](http://research.jisao.washington.edu/data_sets/)), Indian Ocean Dipole (IOD, [https://www.jamstec.go.jp/aplinfo/sintexf/iod/dipole\\_mode\\_index.html](https://www.jamstec.go.jp/aplinfo/sintexf/iod/dipole_mode_index.html)), South Asian Summer Monsoon Index (SASMI, <http://lijianping.cn/dct/page/65576>), Indian Summer Monsoon Index (ISM, <http://apdrc.soest.hawaii.edu/projects/monsoon/>), and the westerly index (WI). The WI is defined as the proportion of days in a month with the prevailing wind direction from the region between 30° E–70° E and 35° N–50° N based on ERA5 estimates.

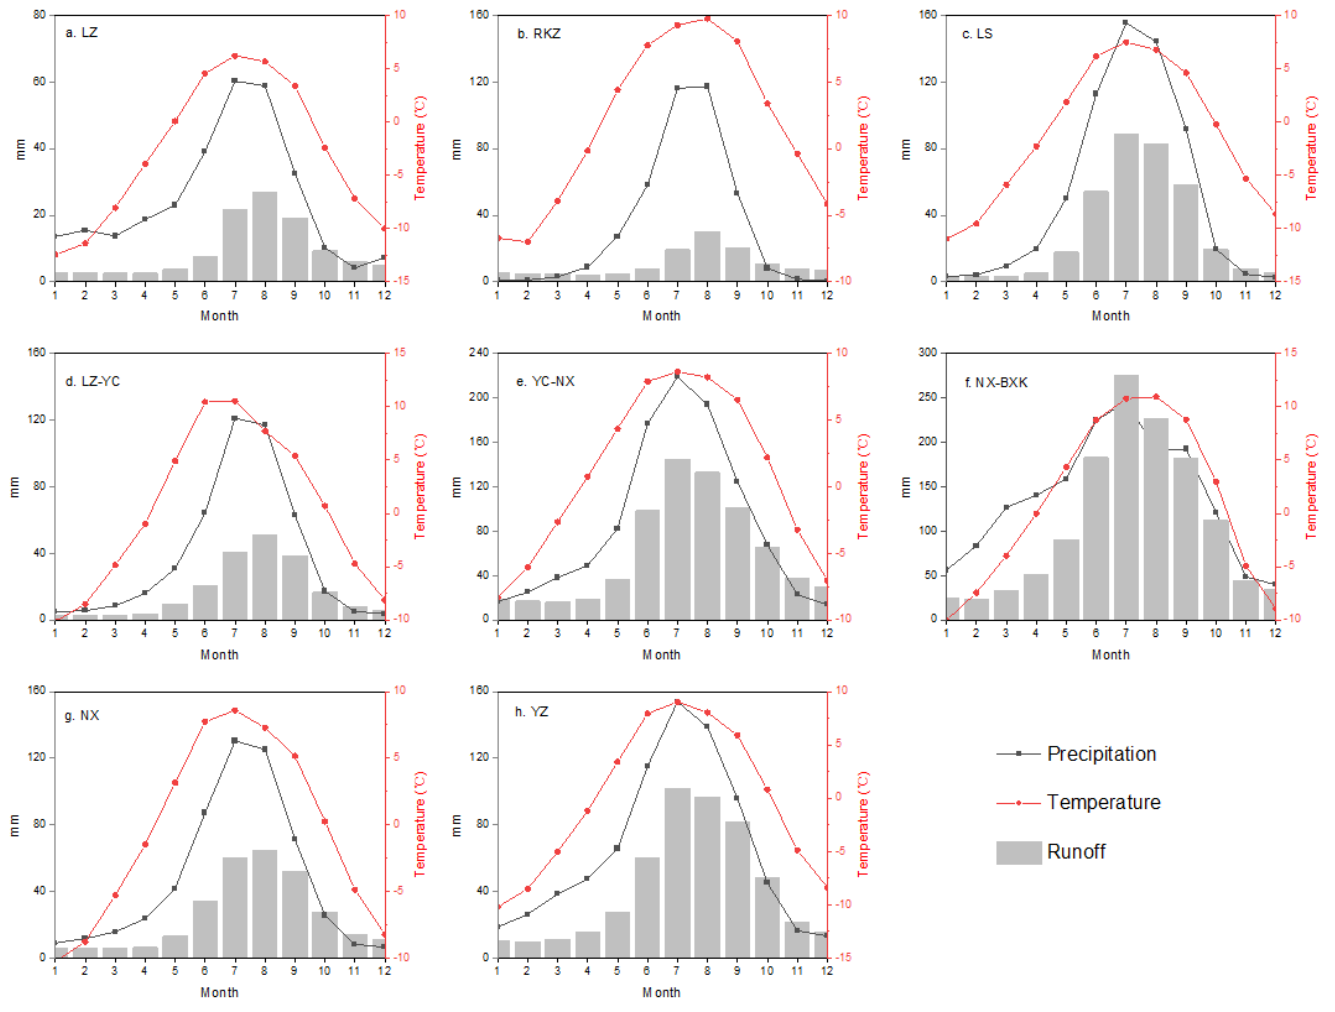

**Figure S1.** Mean monthly precipitation, temperature, and simulated total runoff in the YZ and its sub-basins for 1971–2020.

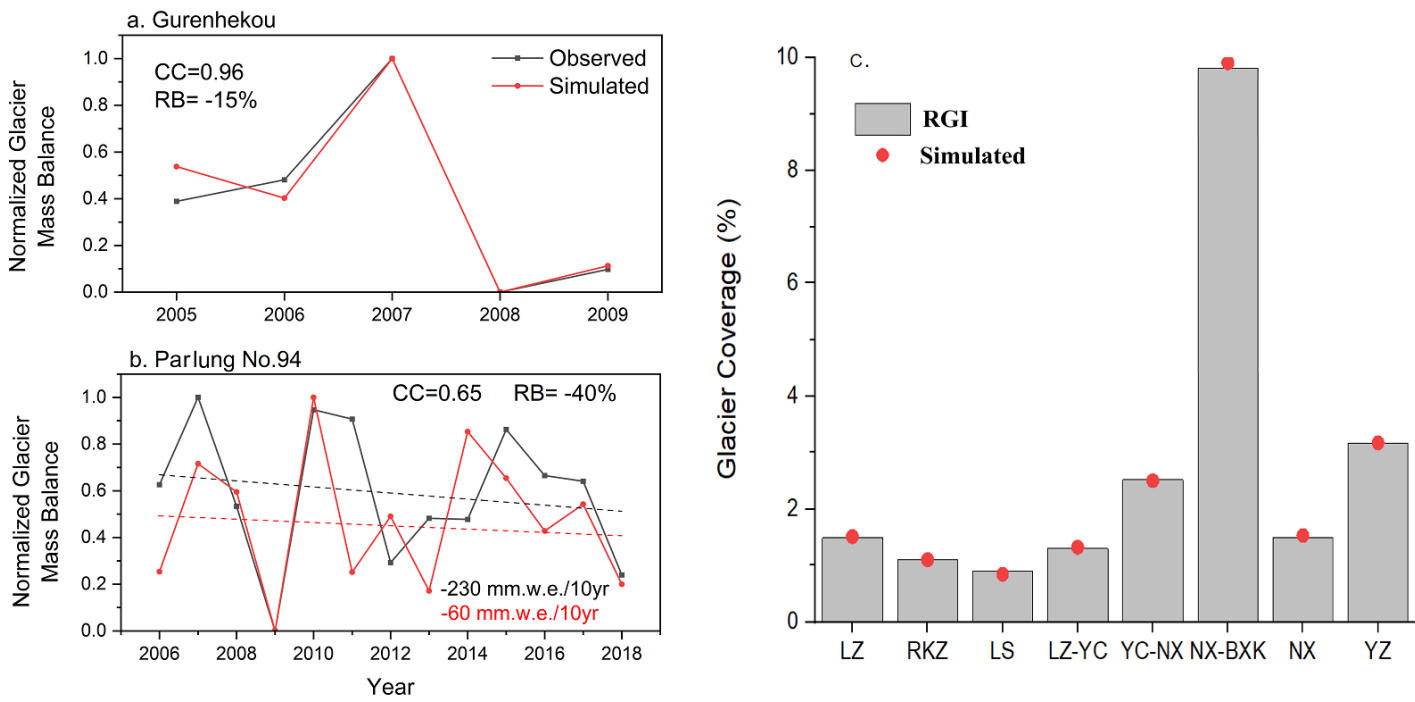

**Figure S2.** Annual time series of observed and simulated glacier mass balance at (a) Gurenhekou for 2005–2009 and (b) Parlung No.94 for 2006–2018 (<http://www.tpc.ac.cn>), and (c) mean annual glacier coverage (%) from the RGI V6.0 during 2000–2010 from the VIC-Glacier model simulation and satellite-based observations over the entire YZ basin and its sub-basins. The number of each figure is calculated with actual magnitudes.



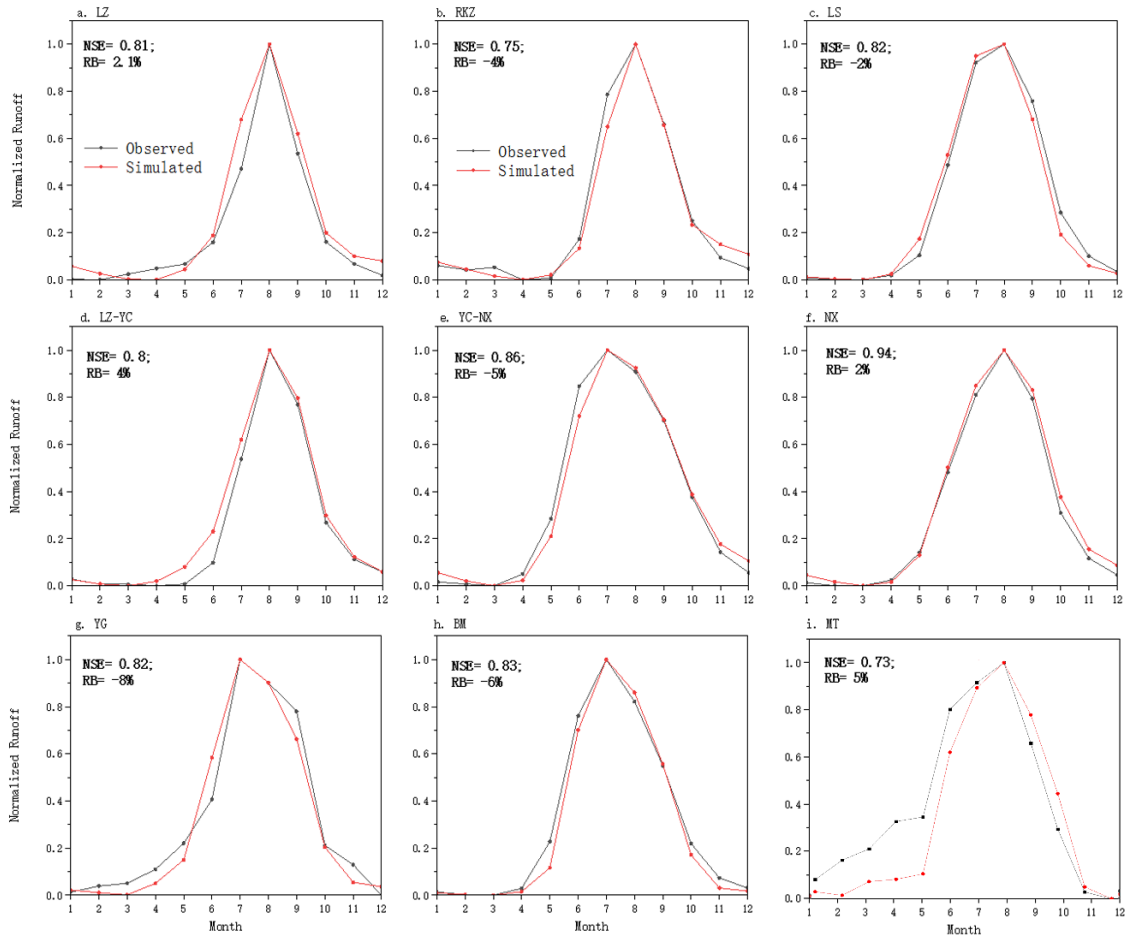

**Figure S3.** Mean monthly observed and simulated runoff at eight hydrological stations of sub-basins in the YZ for 1971–2015 (1981–2000 for YG, 2004–2013 for BM and 2020 for MT). Abbreviations LZ, RKZ, LS, LZ-YC, YC-NX, NX, YG and BM represent the upstream basins of Lhatse, Shigatse, Lhasa, the regions between Lhatse and Yangcun, between Yangcun and Nuxia, Nuxia, Yigong and Bomi, respectively. The number of each figure is calculated with actual magnitudes.

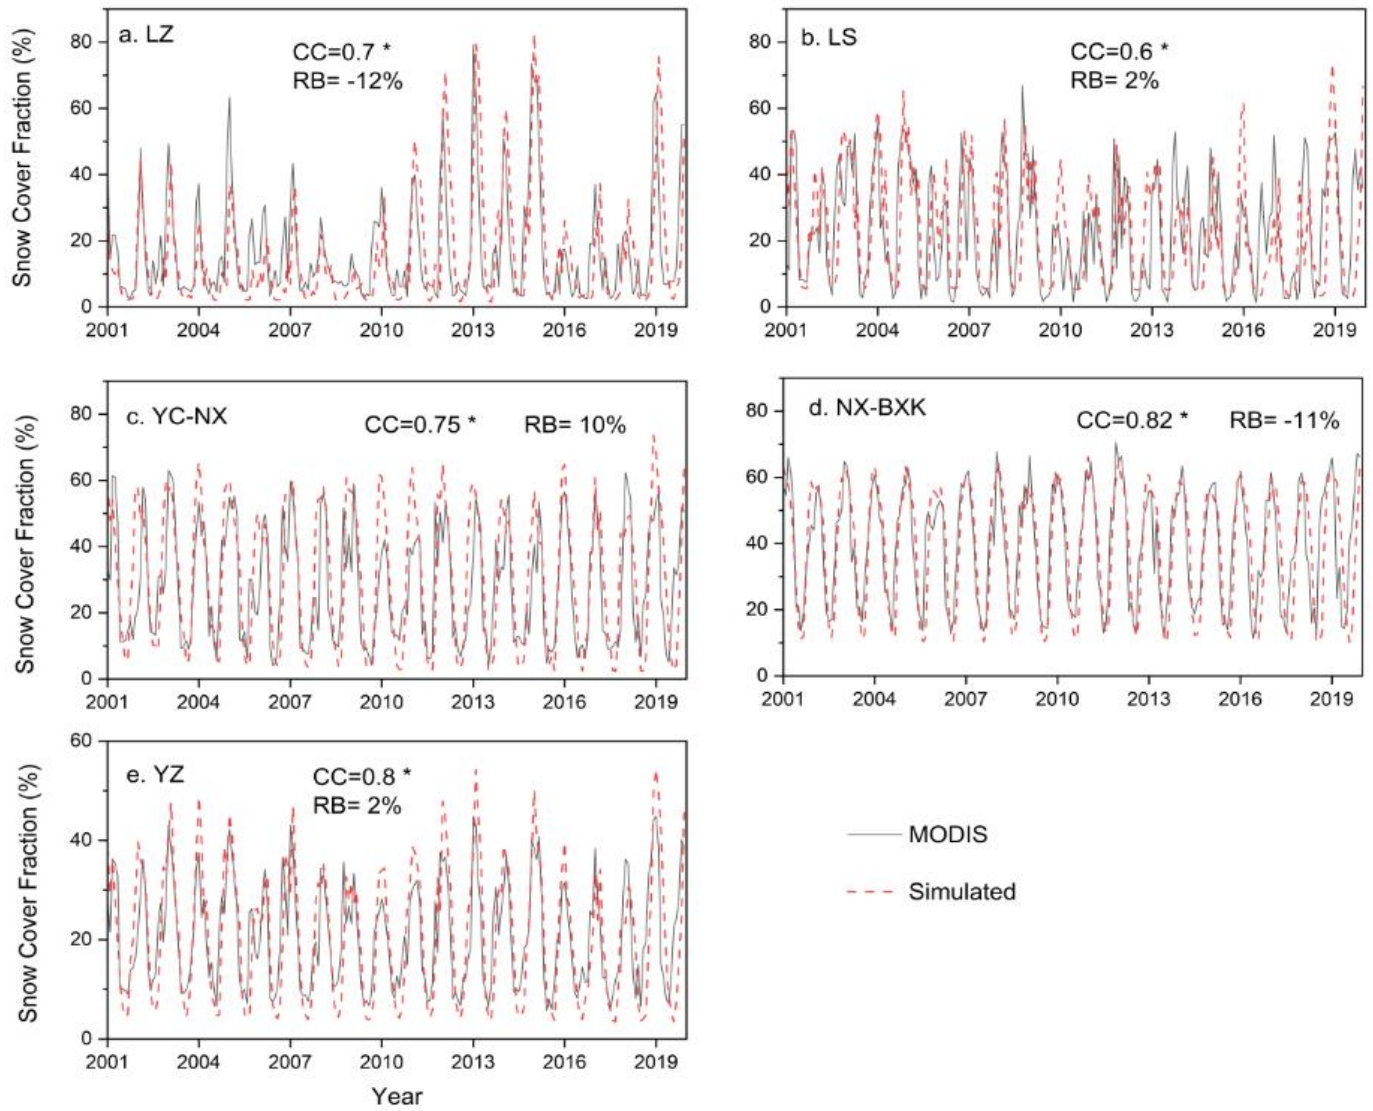

**Figure S4.** Monthly time series of snow cover fraction (%) from the VIC-Glacier model simulation and satellite-based MODIS observations across the entire YZ basin and its four sub-basins for the period 2001–2019. The asterisk indicates a 95% significance confidence level ( $p < 0.05$ ).

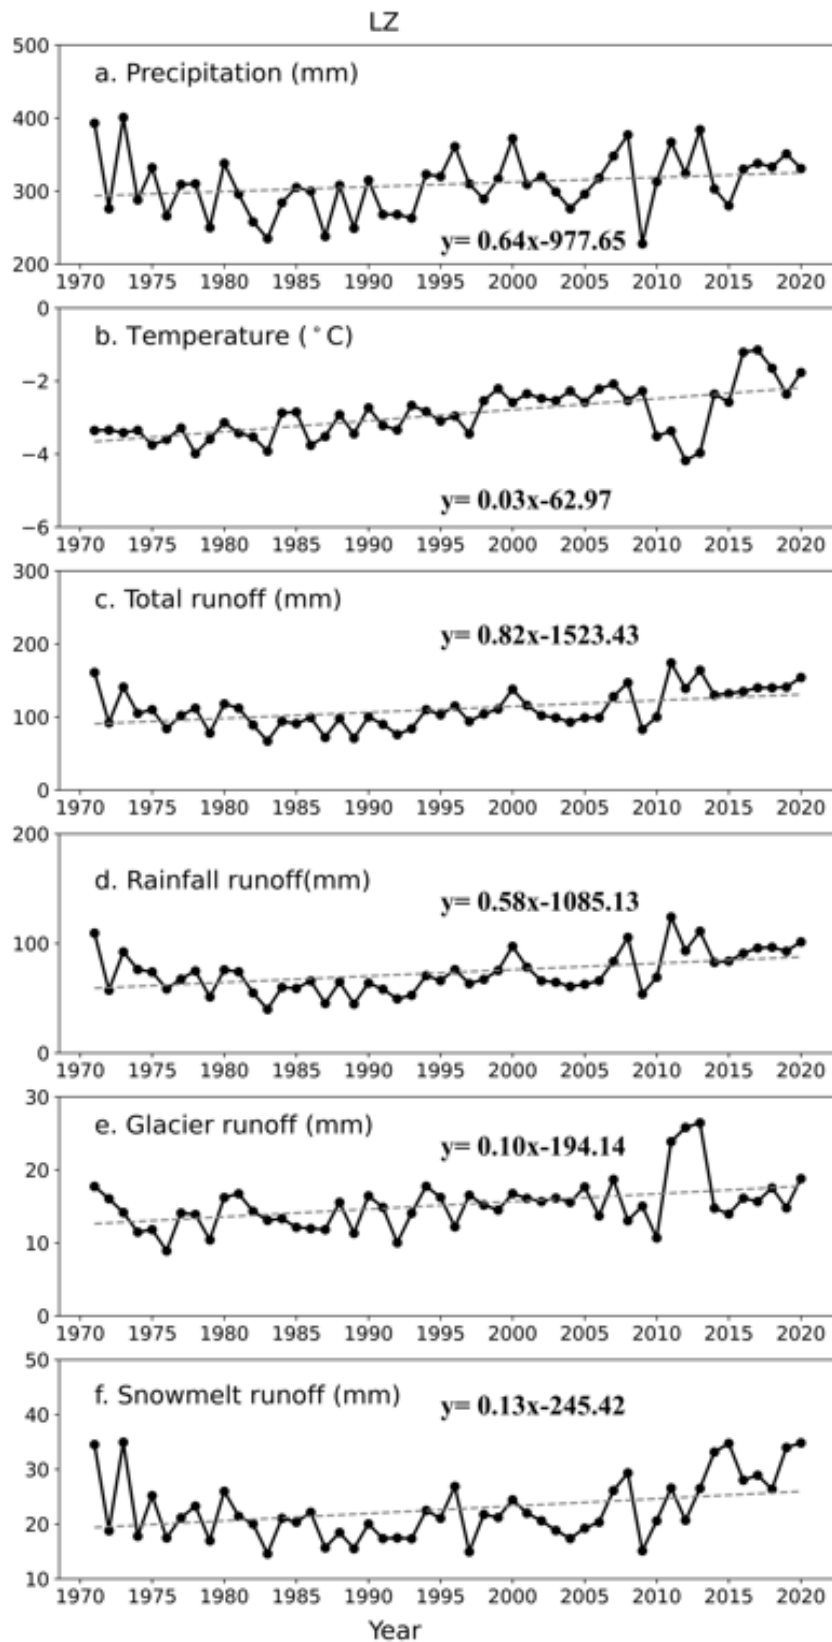

**Figure S5.** Annual variations in precipitation, temperature, total runoff, and the three runoff components (rainfall, glacier, and snowmelt runoff) in the LZ sub-basin for 1971–2020, respectively.

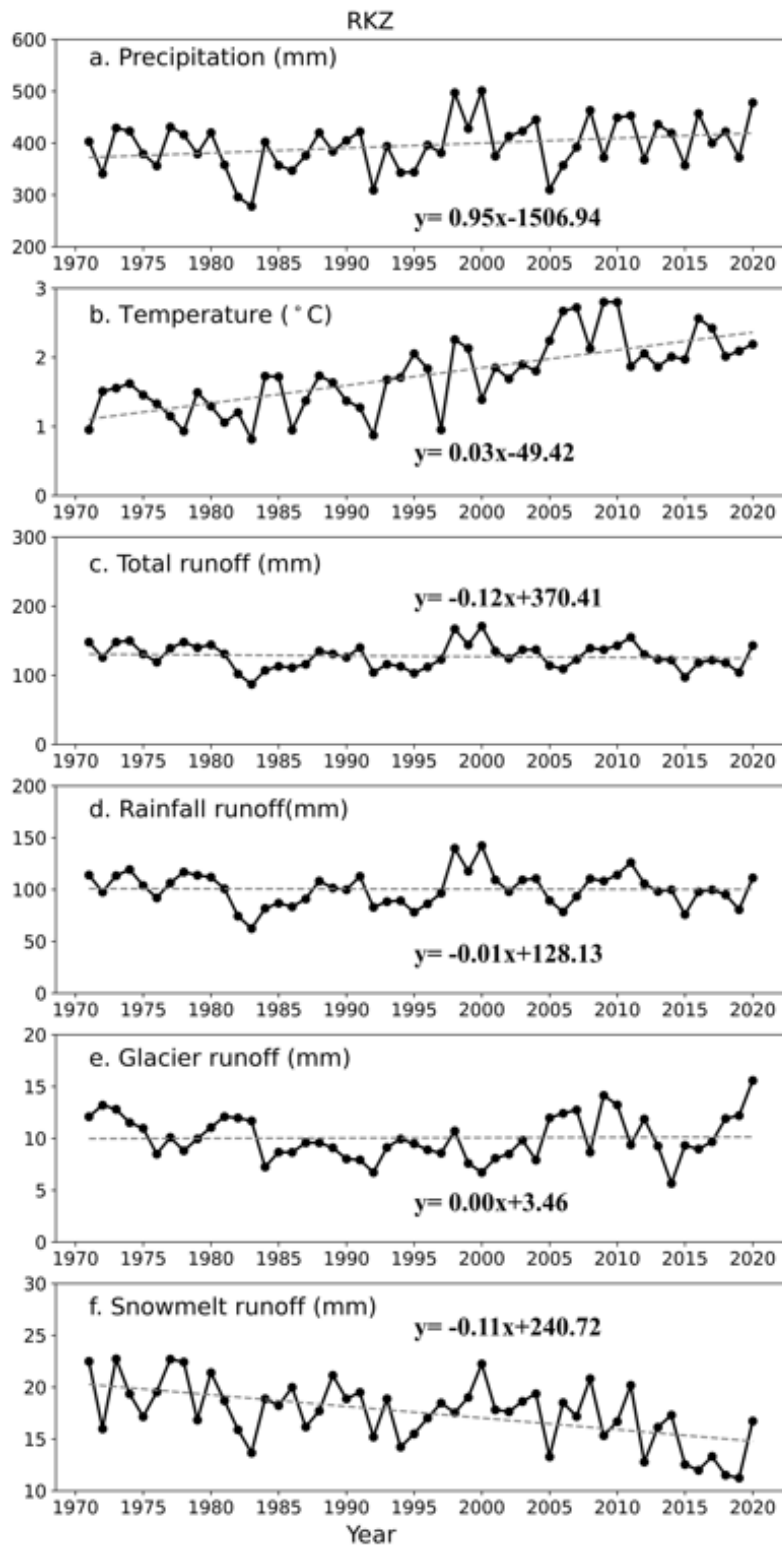

**Figure S6.** Annual variations in precipitation, temperature, total runoff, and the three runoff components (rainfall, glacier, and snowmelt runoff) in the RKZ sub-basin for 1971–2020, respectively.

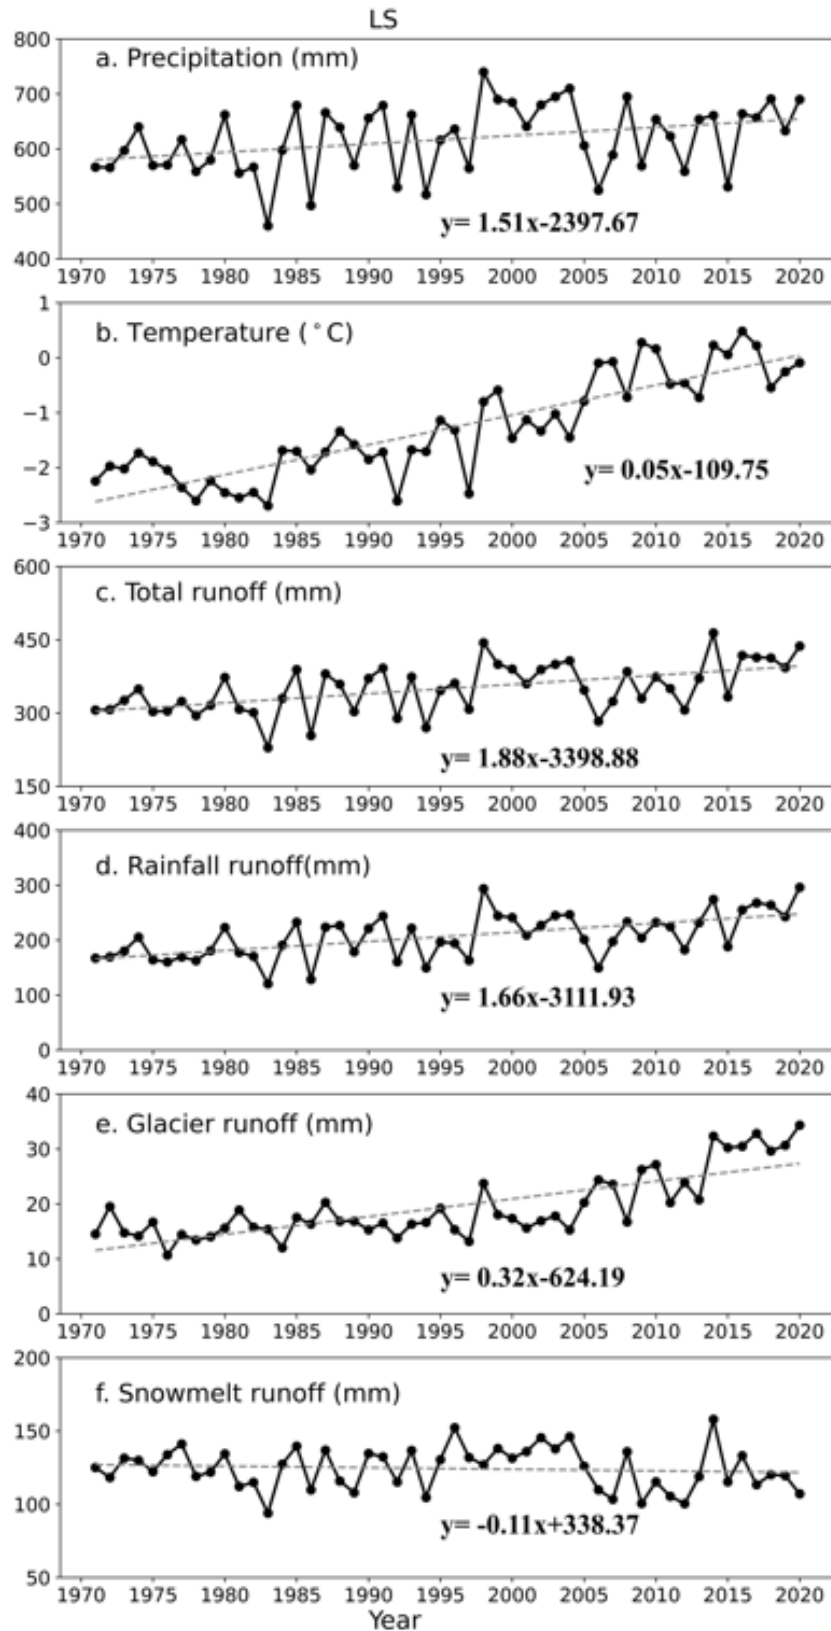

**Figure S7.** Annual variations in precipitation, temperature, total runoff, and the three runoff components (rainfall, glacier, and snowmelt runoff) in the LS sub-basin for 1971–2020, respectively.

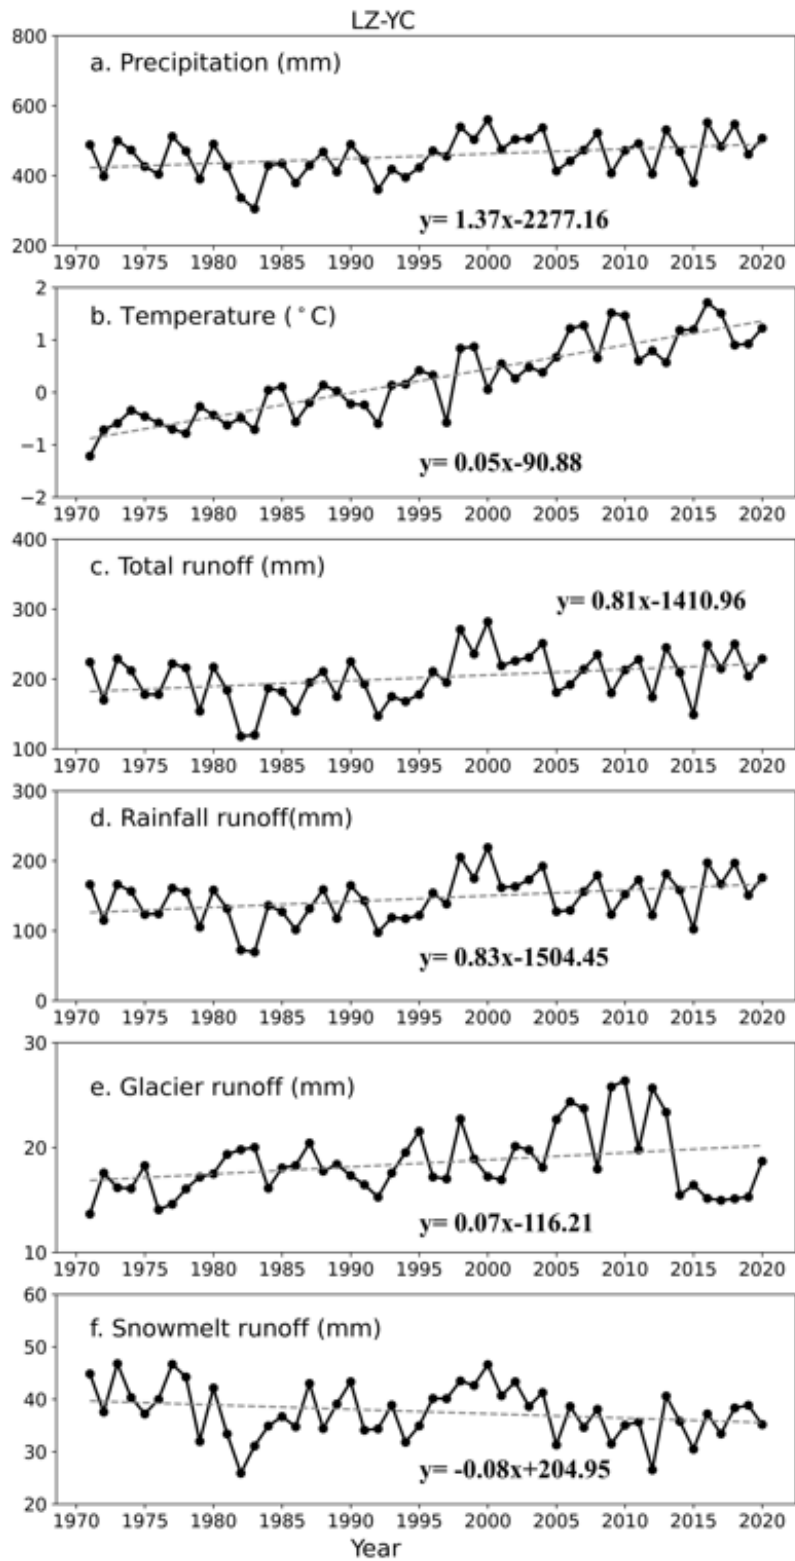

**Figure S8.** Annual variations in precipitation, temperature, total runoff, and the three runoff components (rainfall, glacier, and snowmelt runoff) in the LZ-YC sub-basin for 1971–2020, respectively.

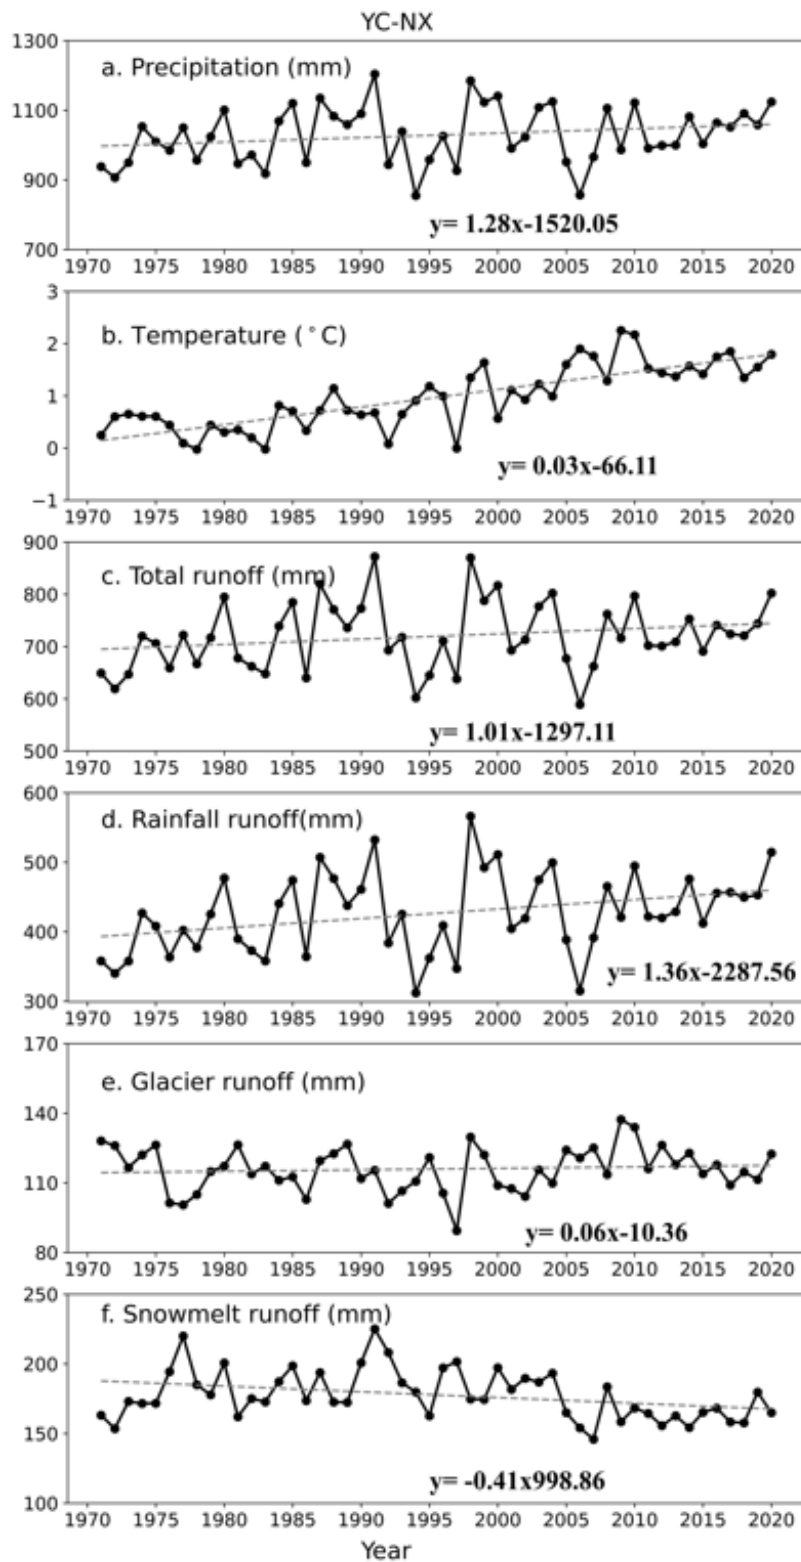

**Figure S9.** Annual variations in precipitation, temperature, total runoff, and the three runoff components (rainfall, glacier, and snowmelt runoff) in the YC-NX sub-basin for 1971–2020, respectively.

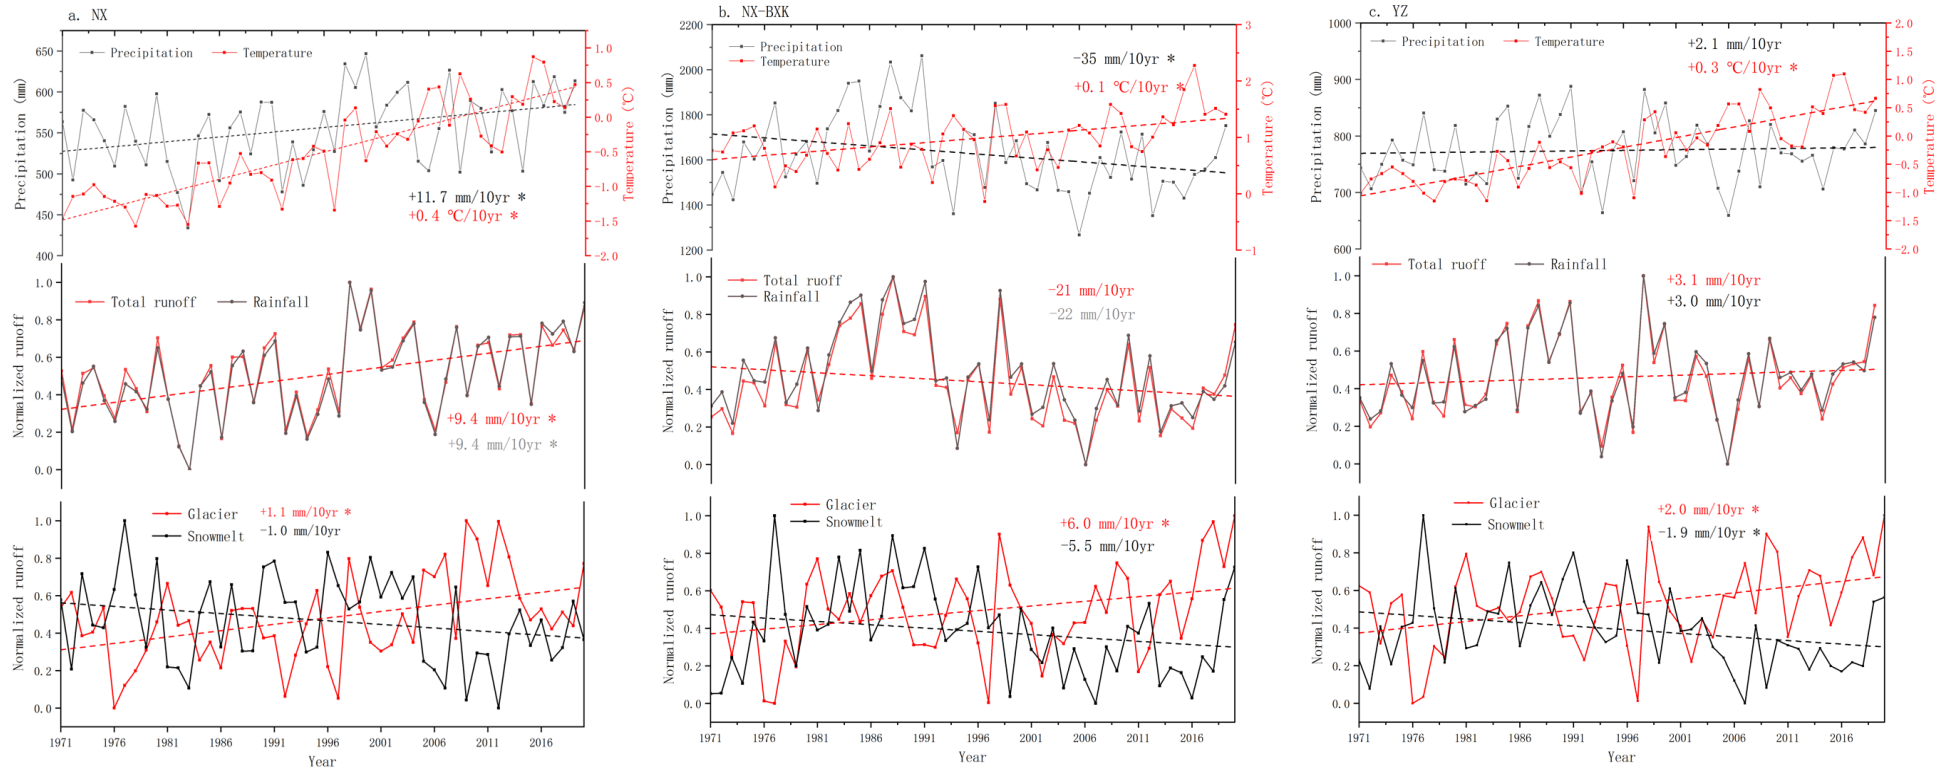

**Figure S10.** Annual variations in precipitation, temperature, total runoff, and the three runoff components (rainfall, glacier, and snowmelt runoff) in the YZ and its sub-basins for 1971–2020, respectively. Linear trends are indicated by dashed lines, and corresponding values are also indicated. Tendency results for sub-basins are shown in the inset table. The number of each figure are calculated with actual magnitudes. Asterisks indicate the 95% significance level.



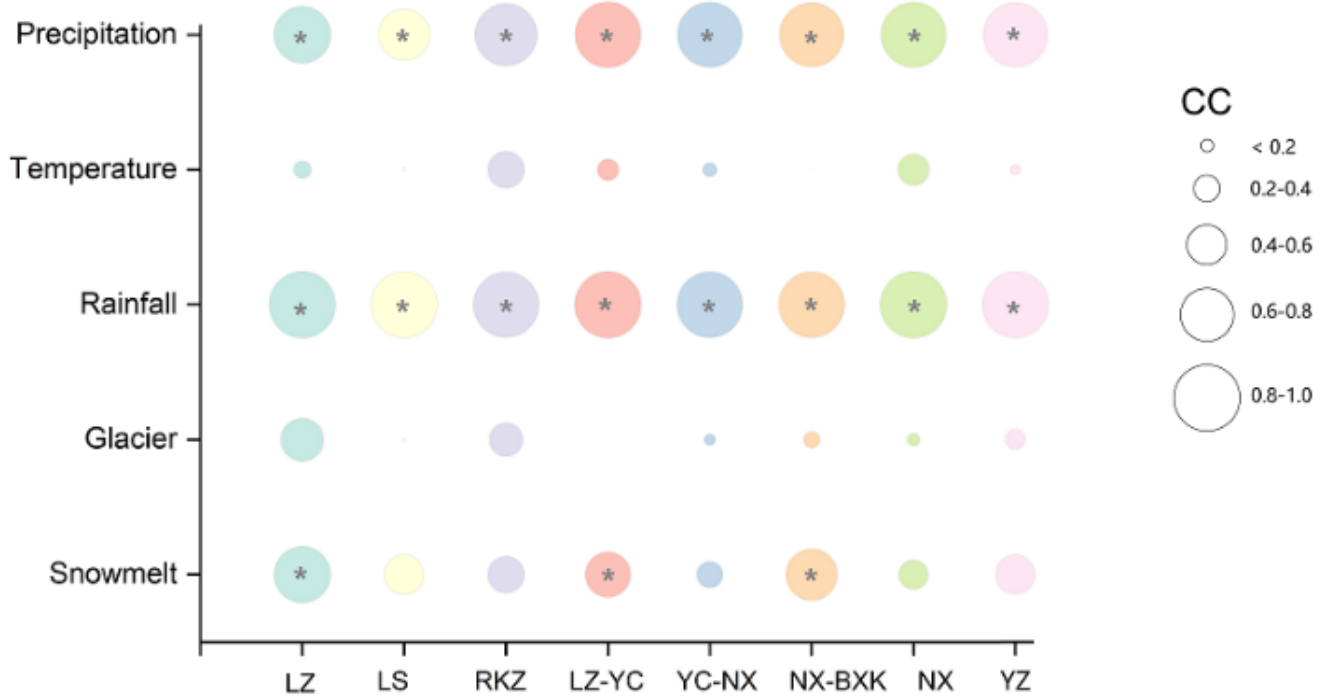

**Figure S11.** Annual correlation between total runoff and precipitation, temperature, and the three runoff components (rainfall, glacier, and snowmelt runoff) in the YZ basin and its sub-basins for 1971–2020, respectively. Asterisks indicate a 95% significance level.

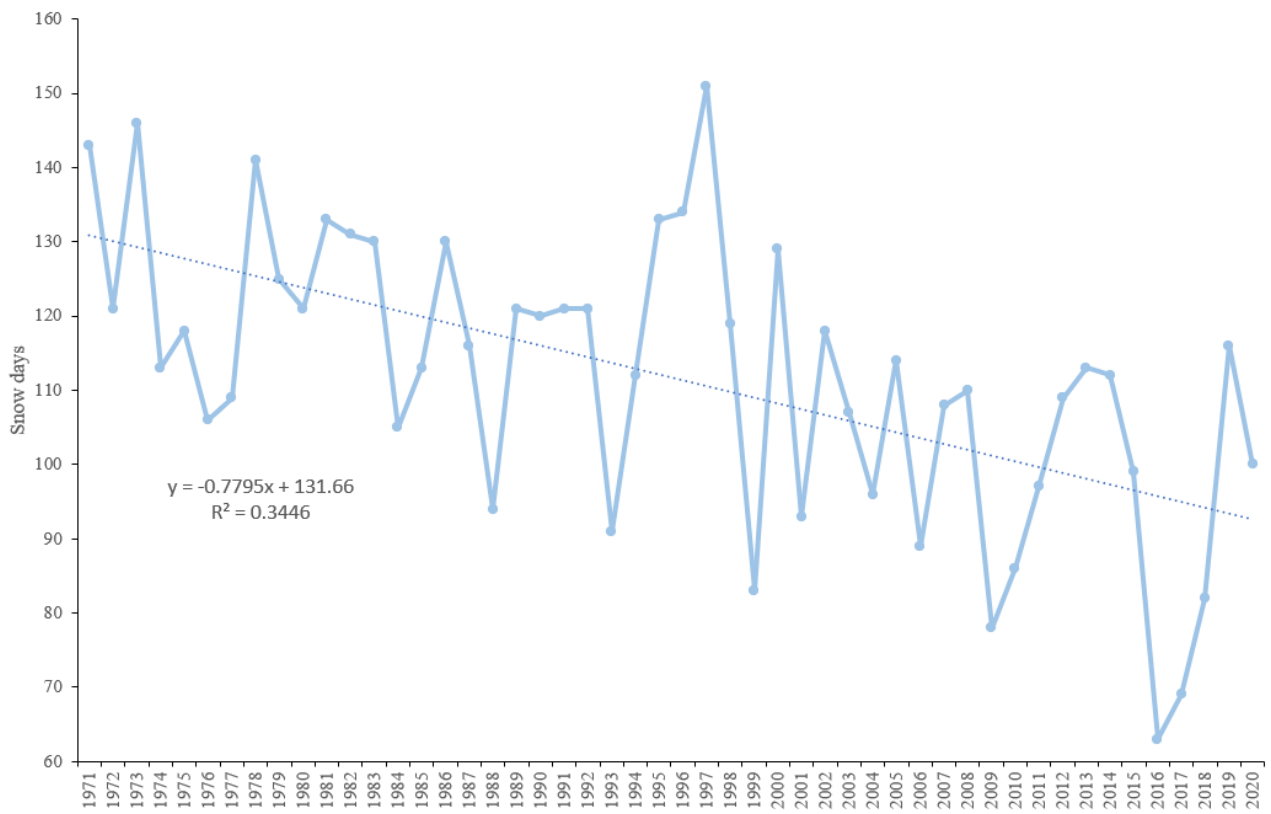

**Figure S12.** Annual time series of snow days in the YZ basin for 1971–2020.

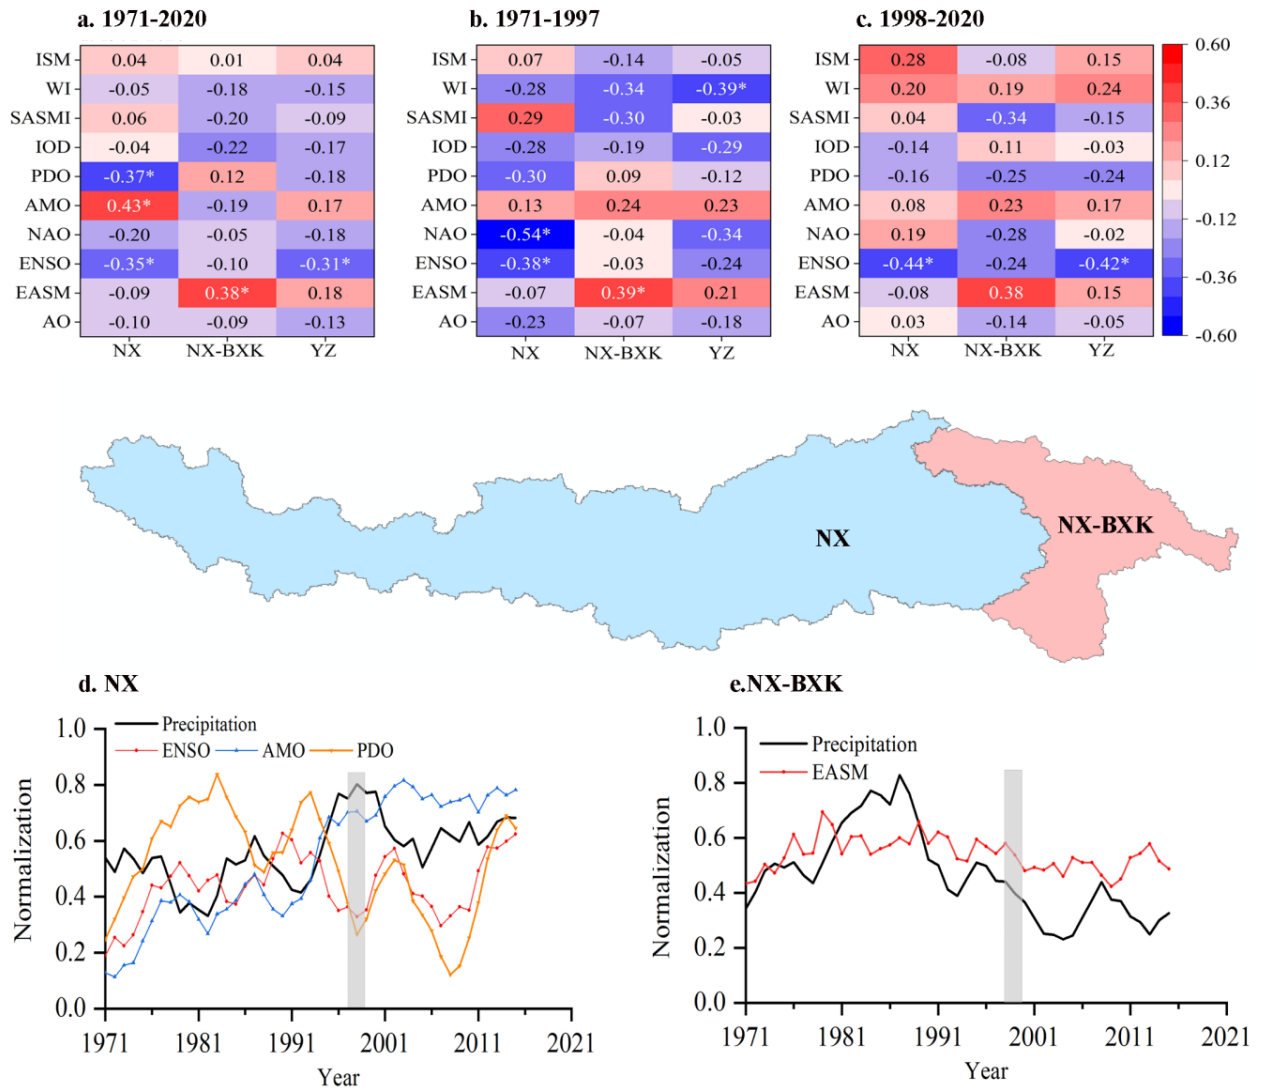

**Figure S13.** Correlations between 10 teleconnection indices and annual precipitation in the YZ basin and its NX and NX-BXK sub-basins (a–c) for 1971–2020. Annual time series of normalized precipitation, ENSO, AMO and PDO in the NX sub-basin (d), and normalized precipitation and EASM in the NX-BXK sub-basin (e) for 1971–2020. Asterisks indicate the 95% significance level.

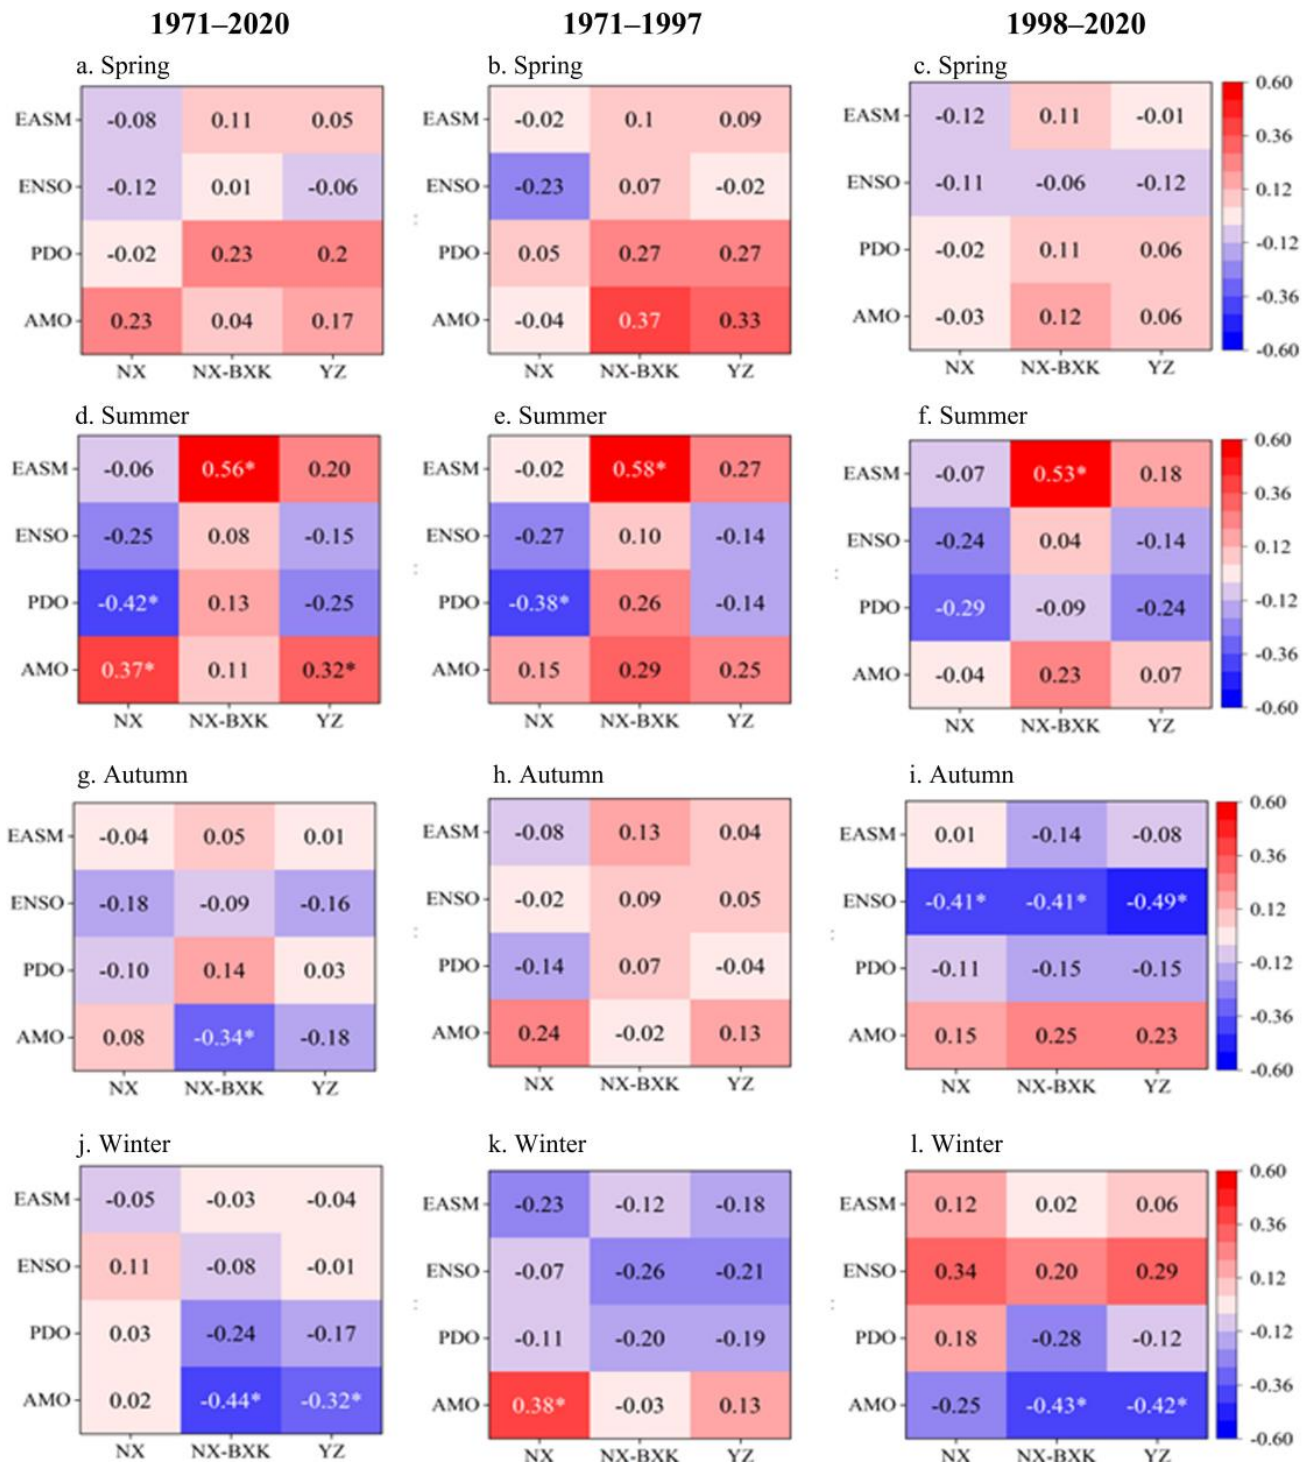

**Figure S14.** Seasonal correlations between four teleconnection indices and annual precipitation in the YZ basin and its NX and NX-BXK sub-basins. Asterisks indicate the 95% significance level.

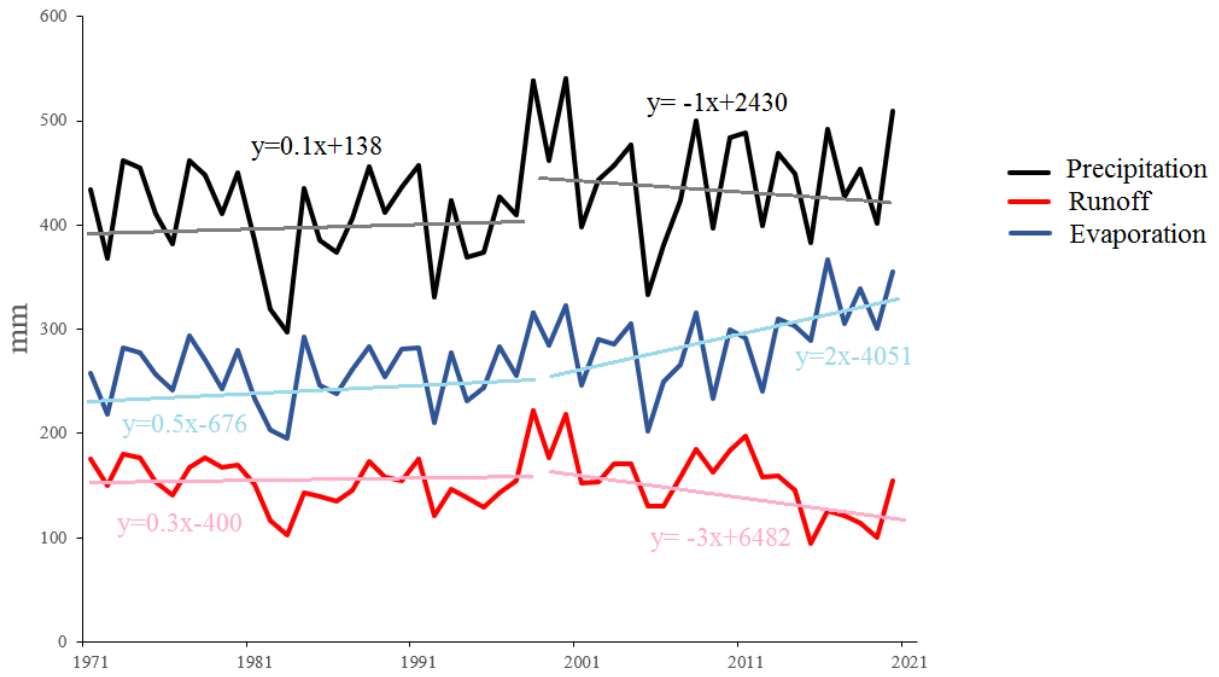

**Figure S15.** Annual variations of precipitation, total runoff, and evaporation in the RKZ sub-basin before and after 1997, respectively.

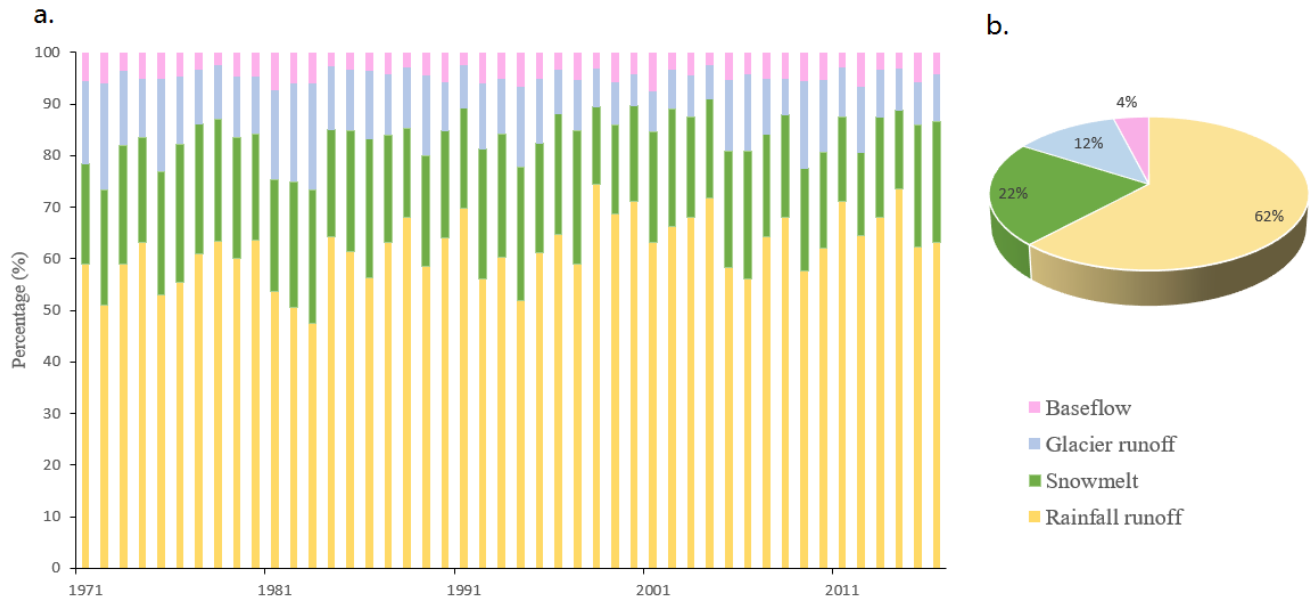

**Figure S16.** (a) Annual variations in contribution of rainfall runoff, snowmelt, glacier runoff and baseflow to total runoff in the YZ basin for 1971–2020. (b) Mean annual contribution of rainfall runoff, snowmelt, glacier runoff and baseflow to total runoff.

**Table S1.** List of data used in this study for the VIC-Glacier model validation.

| Data                 | Source                                                                                                                             | Resolution    | Station name   | Period      |
|----------------------|------------------------------------------------------------------------------------------------------------------------------------|---------------|----------------|-------------|
| Observed runoff      | Tibetan Hydrological Bureaus                                                                                                       | Site, Monthly | Lhatse (LZ)    | 1971–2015   |
|                      |                                                                                                                                    |               | Shigatse (RKZ) | 1971–2015   |
|                      |                                                                                                                                    |               | Lhasa (LS)     | 1971–2015   |
|                      |                                                                                                                                    |               | Yangcun (YC)   | 1971–2015   |
|                      |                                                                                                                                    |               | Nuxia (NX)     | 1971–2015   |
|                      |                                                                                                                                    |               | Yigong (YG)    | 1981–2000   |
|                      |                                                                                                                                    |               | Bomi (BM)      | 2004–2013   |
|                      |                                                                                                                                    |               | Motuo (MT)     | 2020        |
| Glacier mass balance | Institute of Tibetan Plateau Research, Chinese Academy of Sciences ( <a href="http://www.tpdac.ac.cn">http://www.tpdac.ac.cn</a> ) | Site, Annual  | Gurenhekou     | 2005–2009   |
|                      |                                                                                                                                    |               | Parlung No.94  | 2006–2018   |
| Glacier Inventory    | The first Glacier Inventory of China                                                                                               | –             | –              | 1970s–1990s |
|                      | Randolph Glacier Inventory (RGI V6.0)                                                                                              | –             | –              | 2000s–2010s |
| Snow cover fraction  | the Moderate Resolution Imaging Spectroradiometer (MODIS)10CM                                                                      | Site, Annual  | Parlung No.94  | 2006–2018   |
|                      | ( <a href="https://nsidc.org/data">https://nsidc.org/data</a> )                                                                    |               |                |             |

**Table S2.** Changes in mean seasonal precipitation (%), temperature (°C), total runoff, and the three components (%), along with their contributions to total runoff (%) in 1998–2020 relative to the period 1971–1997 in the entire YZ basin and its NX and NX-BXK sub-basins.

|        | Month | Pre    | Tem  | Total  | Glacier | Snow melt | Rainfall | CG    | CS    | CR    |
|--------|-------|--------|------|--------|---------|-----------|----------|-------|-------|-------|
| NX     | Jan   | 1.31   | 1.19 | 4.83   | 0       | 54.4      | 3.57     | 0     | 1.15  | -1.18 |
|        | Feb   | 3.01   | 1.17 | 4.84   | 0       | 35.68     | 2.99     | 0     | 1.62  | -1.70 |
|        | Mar   | -0.88  | 0.35 | 9.41   | 0       | 50.35     | 2.65     | 0     | 5.09  | -5.16 |
|        | Apr   | 6.14   | 0.85 | 17.19  | 0       | 33.49     | 4.82     | 0     | 5.70  | -5.37 |
|        | May   | 17.62  | 0.4  | 22     | 6.56    | 23.58     | 25.24    | -1.42 | 0.81  | 0.61  |
|        | Jun   | 9.08   | 0.55 | 10.83  | 9.3     | -2.47     | 30.16    | -0.23 | -6.17 | 6.40  |
|        | Jul   | 15.81  | 0.44 | 20.74  | 8.91    | -9.2      | 37.54    | -1.71 | -5.92 | 7.63  |
|        | Aug   | 8.28   | 0.59 | 11.36  | 8.79    | -14.35    | 20.41    | -0.34 | -4.84 | 5.18  |
|        | Sep   | -2.58  | 0.69 | 6.63   | 12.72   | -19.89    | 16.22    | 0.88  | -6.42 | 5.54  |
|        | Oct   | 6.15   | 0.7  | 6.14   | 20.83   | -3.94     | 8.61     | 0.93  | -2.30 | 1.37  |
|        | Nov   | -11.89 | 1.54 | 7.05   | 0       | 29.92     | 4.3      | 0     | 2.35  | -2.30 |
|        | Dec   | -11.19 | 2.2  | 5.74   | 0       | 24.49     | 4.99     | 0     | 0.70  | -0.71 |
| NX-BXK | Jan   | -9.97  | 0.63 | -9.54  | 0       | -4.14     | -9.84    | 0     | 0.33  | -0.33 |
|        | Feb   | -16.21 | 0.69 | -14.74 | 0       | -18.2     | -14.21   | 0     | -0.79 | 0.77  |
|        | Mar   | -15.12 | -0.1 | -18.38 | 0       | -28.89    | -13.89   | 0     | -3.87 | 3.85  |
|        | Apr   | -11.04 | 0.16 | -19.61 | 0       | -17.26    | -21.08   | 0     | 1.02  | -1.00 |
|        | May   | 3.11   | 0.09 | -13.28 | 1.65    | -5.45     | -21.75   | 0.66  | 3.10  | -3.77 |
|        | Jun   | -8.35  | 0.35 | -6.32  | 4.43    | -6.08     | -9.86    | 1.54  | 0.15  | -1.68 |
|        | Jul   | -3.15  | 0.41 | -1.34  | 11.85   | -9.5      | -3.06    | 2.81  | -1.90 | -0.91 |
|        | Aug   | 5.23   | 0.34 | -3.54  | 5.02    | -21       | -3.97    | 2.76  | -2.39 | -0.37 |
|        | Sep   | -20.5  | 0.57 | -5.98  | -0.1    | -15.41    | -7.94    | 1.69  | -0.81 | -0.88 |
|        | Oct   | -10.74 | 0.46 | -16.49 | 14.12   | -22.58    | -22.93   | 6.16  | -0.38 | -5.78 |
|        | Nov   | -9.09  | 0.51 | -7.05  | 0       | 6.97      | -7.85    | 0     | 0.64  | -0.72 |
|        | Dec   | -18.61 | 0.86 | -8.29  | 0       | -14.03    | -8.09    | 0     | -0.20 | 0.17  |
| YZ     | Jan   | -3.19  | 0.58 | -1.01  | 0       | 8.3       | -1.4     | 0     | 0.37  | -0.37 |
|        | Feb   | -5.56  | 0.58 | -2.92  | 0       | -3.37     | -2.91    | 0     | -0.04 | 0.01  |
|        | Mar   | -6.06  | 0.14 | -4.76  | 0       | -8.45     | -3.72    | 0     | -0.74 | 0.71  |
|        | Apr   | -2.51  | 0.38 | -5.55  | 0       | -1.92     | -8.12    | 0     | 1.44  | -1.51 |
|        | May   | 5.28   | 0.18 | -1.75  | 1.8     | 2.93      | -8.11    | 0.17  | 2.11  | -2.28 |



|     |       |      |       |      |       |       |      |       |       |
|-----|-------|------|-------|------|-------|-------|------|-------|-------|
| Jun | 1.01  | 0.28 | 0.48  | 3.25 | -1.25 | 1.43  | 0.37 | -0.85 | 0.48  |
| Jul | 4.88  | 0.23 | 3.87  | 5.81 | -5.58 | 6.96  | 0.46 | -2.14 | 1.68  |
| Aug | 3.88  | 0.29 | 2.51  | 3.08 | -9.65 | 5.46  | 0.10 | -1.87 | 1.76  |
| Sep | -5.79 | 0.36 | 0.93  | 1.84 | -10   | 3.16  | 0.26 | -1.63 | 1.37  |
| Oct | -1.87 | 0.35 | -3.48 | 8.36 | -7.61 | -4.86 | 1.61 | -0.63 | -0.98 |
| Nov | -5.79 | 0.72 | 0.43  | 0    | 10.92 | -0.77 | 0    | 1.07  | -1.06 |
| Dec | -9.2  | 1.04 | -0.27 | 0    | 4.21  | -0.48 | 0    | 0.22  | -0.23 |

---

*Note:* Pre= Precipitation; Tem= Temperature; CG= contribution of glacier runoff to total runoff;

CS= contribution of snowmelt runoff to total runoff; CR= contribution of rainfall runoff to total runoff.

**Table S3.** Projected changes (%) in mean annual and seasonal total runoff and its three components (rainfall, snowmelt and glacier) in 2021–2050 and 2071–2100, respectively, relative to 1971–2000 under the two SSPs in the YZ basin and its two sub-basins. The uncertainties are indicated with one standard deviation.

| Basin      | Period                  | Variable | Jan    | Feb   | Mar   | Apr   | May    | Jun     | Jul     | Aug   | Sep   | Oct    | Nov   | Dec   | Ann   |
|------------|-------------------------|----------|--------|-------|-------|-------|--------|---------|---------|-------|-------|--------|-------|-------|-------|
| NX         | 2021-2050<br>(SSP2-4.5) | Total    | -15±3  | -15±3 | -10±4 | -7±6  | -9±7   | -5±7    | 3±7     | -3±3  | -11±4 | -11±5  | -12±3 | -14±3 | -6±4  |
|            |                         | Rainfall | -15±3  | -16±3 | -16±3 | -14±3 | -1±4   | 29±14   | 1±12    | -7±9  | -10±4 | -12±5  | -9±5  | -13±4 | -9±5  |
|            |                         | Snowmelt | 6±7    | -6±6  | -14±7 | -30±5 | -34±5  | -14±5   | 33±12   | 19±5  | -17±3 | -28±3  | -20±5 | -11±6 | -5±4  |
|            |                         | Glacier  | 0±0    | 0±0   | 0±0   | 0±0   | 54±18  | 5±7     | -4±4    | -5±4  | 2±8   | 39±12  | 0±0   | 0±0   | 5±5   |
|            | 2071-2150<br>(SSP2-4.5) | Total    | -6±4   | -6±4  | 0±5   | 8±7   | 5±11   | 1±6     | 14±7    | 9±7   | 2±7   | 5±6    | -2±5  | -4±4  | 6±6   |
|            |                         | Rainfall | -6±4   | -8±3  | -8±3  | -7±4  | 13±7   | 87±22   | 25±14   | 18±9  | 13±8  | 12±9   | 12±7  | -3±4  | 11±7  |
|            |                         | Snowmelt | 38±17  | 27±11 | 25±11 | -10±7 | -30±8  | -19±6   | 20±11   | 8±7   | -20±3 | -26±4  | -9±10 | 13±14 | -8±5  |
|            |                         | Glacier  | 0±0    | 0±0   | 0±0   | 0±0   | 47±29  | 6±8     | -1±7    | 1±8   | 9±13  | 57±25  | 0±0   | 0±0   | 9±8   |
|            | 2021-2050<br>(SSP5-8.5) | Total    | -15±3  | -14±3 | -10±3 | -6±5  | -7±7   | -5±6    | 3±7     | -2±5  | -10±5 | -10±5  | -11±4 | -13±3 | -5±5  |
|            |                         | Rainfall | -35±2  | -41±2 | -30±2 | -36±3 | 24±11  | 320±49  | 157±26  | 8±8   | -27±5 | -48±3  | -40±3 | -29±3 | -9±6  |
|            |                         | Snowmelt | 9±11   | -3±8  | -8±6  | -28±6 | -31±6  | -14±6   | 30±10   | 17±4  | -18±2 | -30±4  | -20±7 | -10±8 | -6±4  |
|            |                         | Glacier  | 0±0    | 0±0   | 0±0   | 0±0   | 55±13  | 7±6     | -1±4    | -1±6  | 7±9   | 52±12  | 0±0   | 0±0   | 9±6   |
|            | 2071-2150<br>(SSP5-8.5) | Total    | 11±10  | 12±9  | 25±11 | 50±17 | 50±18  | 34±13   | 54±28   | 47±24 | 35±17 | 42±19  | 27±16 | 16±12 | 40±18 |
|            |                         | Rainfall | -18±7  | -26±6 | -12±8 | -7±10 | 165±40 | 689±122 | 377±108 | 89±36 | 24±19 | -14±12 | -20±9 | -9±9  | 52±24 |
|            |                         | Snowmelt | 131±32 | 91±21 | 77±21 | 14±15 | -18±11 | -22±8   | 19±13   | 14±13 | -23±7 | -27±8  | 24±16 | 67±21 | -4±7  |
|            |                         | Glacier  | 0±0    | 0±0   | 0±0   | 0±0   | 187±72 | 72±23   | 45±21   | 48±24 | 78±31 | 0±0    | 0±0   | 0±0   | 78±27 |
| NX-<br>BXX | 2021-2050<br>(SSP2-4.5) | Total    | -17±3  | -18±3 | -20±5 | -10±9 | -15±7  | -18±6   | -10±6   | -11±4 | -16±4 | -15±7  | -15±4 | -17±3 | -14±4 |
|            |                         | Rainfall | -16±3  | -15±4 | -16±5 | -5±12 | -16±11 | -21±9   | -19±7   | -19±5 | -23±5 | -20±7  | -17±4 | -17±2 | -19±5 |
|            |                         | Snowmelt | -38±6  | -43±4 | -36±5 | -27±6 | -26±5  | -20±4   | 14±8    | 33±7  | 48±7  | -9±9   | -27±8 | -31±7 | -6±4  |
|            |                         | Glacier  | 0±0    | 0±0   | 0±0   | 0±0   | 77±14  | -1±6    | -10±5   | -16±3 | -14±4 | 4±8    | 0±0   | 0±0   | -7±4  |
|            | 2071-2150               | Total    | -10±4  | -9±6  | -9±6  | 9±13  | 6±12   | -5±8    | 3±11    | -2±8  | -4±9  | 1±12   | -8±5  | -10±4 | -1±7  |

|                         |                         |                         |          |       |       |        |       |        |        |       |        |        |       |       |       |       |
|-------------------------|-------------------------|-------------------------|----------|-------|-------|--------|-------|--------|--------|-------|--------|--------|-------|-------|-------|-------|
|                         | (SSP2-4.5)              | Rainfall                | -9±3     | -8±5  | -3±6  | 13±16  | 15±18 | 1±12   | 1±12   | -5±10 | -7±9   | -5±12  | -10±5 | -10±4 | -2±8  |       |
|                         |                         | Snowmelt                | -24±11   | -26±9 | -27±7 | -8±10  | -15±8 | -16±9  | 15±8   | 34±7  | 62±24  | 23±19  | -24±9 | -19±7 | 1±5   |       |
|                         |                         | Glacier                 | 0±0      | 0±0   | 0±0   | 0±0    | 95±32 | 5±10   | -5±10  | -13±8 | -12±7  | 21±14  | 0±0   | 0±0   | -1±8  |       |
|                         | 2021-2050<br>(SSP5-8.5) | Total                   | -17±3    | -18±4 | -20±3 | -12±5  | -16±5 | -18±5  | -10±4  | -10±3 | -13±4  | -13±9  | -13±5 | -16±3 | -13±3 |       |
|                         |                         | Rainfall                | -16±3    | -15±4 | -15±4 | -6±6   | -17±5 | -23±9  | -20±6  | -19±5 | -21±5  | -18±9  | -17±4 | -17±3 | -19±5 |       |
|                         |                         | Snowmelt                | -38±4    | -42±7 | -37±4 | -31±6  | -26±4 | -19±4  | 15±5   | 33±6  | 52±6   | -6±12  | -25±9 | -32±8 | -5±2  |       |
|                         | 2071-2150<br>(SSP5-8.5) | Glacier                 | 0±0      | 0±0   | 0±0   | 0±0    | 81±15 | 2±7    | -7±4   | -13±4 | -11±5  | 10±7   | 0±0   | 0±0   | -4±4  |       |
|                         |                         | Total                   | 2±6      | 6±7   | 21±12 | 51±23  | 45±19 | 21±16  | 24±19  | 24±16 | 22±17  | 34±20  | 11±11 | 3±7   | 25±14 |       |
|                         |                         | Rainfall                | 0±6      | 4±6   | 23±13 | 55±31  | 62±27 | 39±25  | 21±25  | 10±18 | 1±15   | 10±15  | -1±7  | -2±6  | 18±14 |       |
|                         | YZ                      | 2021-2050<br>(SSP2-4.5) | Snowmelt | 4±17  | -6±8  | -6±13  | 16±15 | -2±14  | -17±10 | 12±7  | 73±16  | 171±45 | 95±47 | 4±17  | 10±15 | 17±7  |
|                         |                         |                         | Glacier  | 0±0   | 0±0   | 0±0    | 0±0   | 291±85 | 74±28  | 42±24 | 27±19  | 33±20  | 0±0   | 0±0   | 0±0   | 57±25 |
|                         |                         |                         | Total    | -16±3 | -16±3 | -17±3  | -9±8  | -14±7  | -13±6  | -5±6  | -6±3   | -13±4  | -13±6 | -13±4 | -15±3 | -10±4 |
| 2071-2150<br>(SSP2-4.5) |                         | Rainfall                | -16±3    | -15±3 | -15±3 | -5±9   | -9±11 | -12±9  | -15±7  | -13±4 | -18±4  | -15±6  | -15±3 | -16±3 | -14±5 |       |
|                         |                         | Snowmelt                | -20±6    | -33±4 | -30±5 | -28±5  | -30±5 | -20±4  | 21±8   | 28±6  | -2±3   | -26±4  | -24±4 | -22±5 | -5±3  |       |
|                         |                         | Glacier                 | 0±0      | 0±0   | 0±0   | 0±0    | 70±16 | 4±6    | -7±4   | -12±3 | -9±5   | 13±9   | 0±0   | 0±0   | -2±4  |       |
| 2021-2050<br>(SSP5-8.5) |                         | Total                   | -7±4     | -8±4  | -6±5  | 8±10   | 6±12  | -3±7   | 7±8    | 5±7   | 0±8    | 2±9    | -4±5  | -7±4  | 2±6   |       |
|                         |                         | Rainfall                | -8±3     | -8±4  | -5±4  | 11±12  | 26±18 | 11±12  | 7±9    | 6±9   | 2±9    | 3±9    | -6±4  | -8±3  | 4±7   |       |
|                         |                         | Snowmelt                | 3±12     | -12±9 | -15±7 | -7±9   | -21±7 | -19±7  | 15±8   | 21±6  | -2±6   | -20±4  | -15±9 | -5±10 | -4±4  |       |
| 2071-2150<br>(SSP5-8.5) |                         | Glacier                 | 0±0      | 0±0   | 0±0   | 0±0    | 74±30 | 8±9    | -3±8   | -8±8  | -5±9   | 31±17  | 0±0   | 0±0   | 3±8   |       |
|                         |                         | Total                   | -16±2    | -16±2 | -16±2 | -10±4  | -14±5 | -13±5  | -5±5   | -5±3  | -11±5  | -11±6  | -12±4 | -14±3 | -9±4  |       |
|                         |                         | Rainfall                | -16±3    | -16±3 | -15±3 | -6±5   | -10±6 | -14±9  | -15±6  | -12±5 | -16±5  | -14±7  | -14±4 | -16±3 | -14±5 |       |
| 2021-2050<br>(SSP5-8.5) | Snowmelt                | -19±5                   | -32±6    | -29±3 | -30±5 | -28±4  | -20±4 | 20±7   | 27±5   | -2±3  | -27±4  | -24±6  | -22±6 | -6±3  |       |       |
|                         | Glacier                 | 0±0                     | 0±0      | 0±0   | 0±0   | 72±14  | 6±6   | -4±4   | -9±4   | -5±6  | 21±9   | 0±0    | 0±0   | 2±5   |       |       |
|                         | Total                   | 7±8                     | 9±8      | 21±9  | 50±19 | 47±18  | 27±14 | 35±21  | 38±21  | 30±17 | 37±18  | 21±14  | 11±9  | 32±15 |       |       |
| 2071-2150<br>(SSP5-8.5) | Rainfall                | 3±7                     | 5±7      | 16±9  | 49±23 | 79±28  | 58±25 | 42±29  | 38±24  | 28±18 | 30±17  | 11±11  | 5±8   | 33±18 |       |       |
|                         | Snowmelt                | 56±20                   | 21±11    | 14±14 | 18±14 | -8±12  | -20±9 | 12±5   | 40±14  | 14±11 | -13±11 | 12±14  | 36±17 | 5±6   |       |       |
|                         | Glacier                 | 0±0                     | 0±0      | 0±0   | 0±0   | 250±81 | 80±26 | 44±22  | 34±21  | 46±23 | 0±0    | 0±0    | 0±0   | 65±26 |       |       |

**Table S4.** Projected changes (%) in mean annual and seasonal precipitation in 2021–2050 and 2071–2100, respectively, relative to 1971–2000 under the two SSPs in the YZ basin and its two sub-basins. The uncertainties are indicated with one standard deviation.

| Basin      | Period                  | Jan      | Feb      | Mar      | Apr      | May      | Jun      | Jul      | Aug      | Sep      | Oct      | Nov      | Dec      | Ann      |
|------------|-------------------------|----------|----------|----------|----------|----------|----------|----------|----------|----------|----------|----------|----------|----------|
| NX         | 2021-2050<br>(SSP2-4.5) | -1.5±5.7 | 0.1±7.3  | -4.1±4.7 | 6.9±7.8  | 18.4±10  | 10.5±8.5 | 11.4±3.8 | 1.2±4.0  | 3.7±5.4  | 6.6±5.43 | -10.8±9  | -11.8±13 | 6.50±3.3 |
|            | 2071-2100<br>(SSP2-4.5) | -0.1±9   | 1.8±7.6  | -2.9±5.9 | 14.2±14  | 25.4±10  | 15.4±8.5 | 18.1±4.9 | 9.0±4.80 | 11.9±5.2 | 14.8±8.9 | -12.6±9  | -12.3±13 | 12.8±3.8 |
|            | 2021-2050<br>(SSP5-8.5) | -0.5±7.6 | 1.2±4.7  | 1.02±7.1 | 10.9±9.4 | 20.2±9   | 8.7±10.1 | 10.1±4.8 | 2.7±4.6  | 2.8±5.2  | 3.2±8.3  | -13.6±8  | -14.5±9  | 6.42±3.7 |
|            | 2071-2100<br>(SSP5-8.5) | 3.69±10  | 6.41±7.7 | 5.95±8.8 | 29.9±18  | 49.2±13  | 34.9±14  | 36.5±18  | 24±11.3  | 22.3±7.9 | 40.8±14  | 3.5±12.4 | -9.5±10  | 29.4±9.6 |
| NX-<br>BKK | 2021-2050<br>(SSP2-4.5) | -1.1±11  | -3.4±5.1 | -3.6±8.4 | 2.5±11.8 | 9.7±9.9  | -0.2±5.8 | 1.94±7.8 | -3.4±4.5 | -9.5±6.1 | -7.2±9.7 | -15.4±12 | -11±9.9  | -1.9±3.8 |
|            | 2071-2100<br>(SSP2-4.5) | 2.8±11.6 | -1.1±8.4 | 1.04±9.2 | 12.2±14  | 22.9±14  | 4.74±6.6 | 11.5±11  | -0.1±8.6 | -2.7±9.9 | -1.6±13  | -14.2±11 | -10±11   | 4.55±5.1 |
|            | 2021-2050<br>(SSP5-8.5) | -3.1±7.8 | -4.4±7.3 | -1.6±5.2 | -0.1±6.9 | 9.91±5.9 | -2.7±6.9 | 0.68±6.7 | -3.3±6.1 | -7.5±5.8 | -7.9±13  | -15.5±9  | -16±9.3  | -2.6±3.3 |
|            | 2071-2100               | 9±13     | 4.13±6.3 | 15.3±16  | 32.8±21  | 41.4±18  | 17.5±14  | 22.2±20  | 8.8±16.8 | -1.6±10  | 11.9±15  | -1.8±13  | -7.8±18  | 15.6±8.7 |

|    |                         |          |          |          |          |         |         |          |          |          |          |          |          |          |
|----|-------------------------|----------|----------|----------|----------|---------|---------|----------|----------|----------|----------|----------|----------|----------|
|    | (SSP5-8.5)              |          |          |          |          |         |         |          |          |          |          |          |          |          |
| YZ | 2021-2050<br>(SSP2-4.5) | -1.3±8.7 | -2.2±5.7 | -3.8±6.5 | 4.19±9.9 | 14±9.8  | 6±7     | 8.2±4.9  | -0.1±3.7 | -1.8±4.7 | -1.1±7   | -13±10   | -11.3±10 | 2.76±3.3 |
|    | 2071-2100<br>(SSP2-4.5) | 1.7±10.3 | -0.1±7.6 | -0.2±7.4 | 13±14    | 24.1±11 | 11±6.23 | 15.9±6   | 6.3±5.68 | 5.7±6.37 | 5.5±10.8 | -13.5±10 | -10±11   | 9.2±4.28 |
|    | 2021-2050<br>(SSP5-8.5) | -2.1±7.2 | -2.5±5.5 | -0.8±5.6 | 4±7      | 15±6.3  | 4±8.2   | 6.9±4.84 | 1±4.5    | -1.5±4.8 | -3±10.2  | -14±7.7  | -15±8.4  | 2.4±3.2  |
|    | 2071-2100<br>(SSP5-8.5) | 7±11.9   | 4.9±5.9  | 12.4±13  | 31.7±19  | 45.3±14 | 27.7±13 | 31.6±18  | 20.2±11  | 12.2±8.1 | 24.6±14  | 0.3±12.9 | -8±14.8  | 23.3±8.7 |

**Table S5.** Projected changes (°C) in mean annual and seasonal temperature in 2021–2050 and 2071–2100, respectively, relative to 1971–2000 under the two SSPs in the YZ basin and its two sub-basins. The uncertainties are indicated with one standard deviation.

| Basin      | Period     | Jan    | Feb    | Mar    | Apr    | May    | Jun    | Jul    | Aug    | Sep    | Oct    | Nov    | Dec    | Ann    |
|------------|------------|--------|--------|--------|--------|--------|--------|--------|--------|--------|--------|--------|--------|--------|
| NX         | 2021-2050  | 1.43±  | 1.04±  | 1.139± | 1.428± | 1.231± | 1.023± | 0.835± | 0.939± | 1.027± | 0.838± | 1.372± | 1.657± | 1.163± |
|            | (SSP2-4.5) | 0.35   | 0.535  | 0.527  | 0.607  | 0.524  | 0.348  | 0.209  | 0.26   | 0.383  | 0.184  | 0.507  | 0.597  | 0.279  |
|            | 2071-2100  | 3.192± | 2.952± | 2.93±  | 3.226± | 2.95±  | 2.541± | 2.412± | 2.459± | 2.58±  | 2.55±  | 3.508± | 3.787± | 2.924± |
|            | (SSP2-4.5) | 0.935  | 0.651  | 0.51   | 0.678  | 0.795  | 0.42   | 0.468  | 0.46   | 0.606  | 0.508  | 1.097  | 0.9    | 0.472  |
| NX         | 2021-2050  | 1.599± | 1.34±  | 1.341± | 1.42±  | 1.178± | 1.111± | 1.061± | 1.147± | 1.207± | 1.256± | 1.821± | 1.953± | 1.369± |
|            | (SSP5-8.5) | 0.29   | 0.543  | 0.335  | 0.378  | 0.422  | 0.336  | 0.258  | 0.288  | 0.395  | 0.196  | 0.728  | 0.443  | 0.222  |
|            | 2071-2100  | 6.227± | 5.826± | 5.72±  | 5.982± | 5.435± | 4.735± | 4.535± | 4.721± | 5.05±  | 5.558± | 6.679± | 6.916± | 5.615± |
|            | (SSP5-8.5) | 0.778  | 0.634  | 0.805  | 1.252  | 1.095  | 0.838  | 1.064  | 1.158  | 1.05   | 1.224  | 1.684  | 1.489  | 0.853  |
| NX-<br>BKK | 2021-2050  | 0.88±  | 0.56±  | 0.274± | 0.537± | 0.427± | 0.32±  | 0.465± | 0.543± | 0.671± | 0.327± | 0.708± | 1.204± | 0.576± |
|            | (SSP2-4.5) | 0.454  | 0.475  | 0.396  | 0.349  | 0.207  | 0.326  | 0.326  | 0.311  | 0.323  | 0.303  | 0.334  | 0.534  | 0.246  |
|            | 2071-2100  | 2.55±  | 2.291± | 1.88±  | 2.245± | 2.083± | 1.895± | 2.036± | 2.027± | 2.162± | 1.923± | 2.64±  | 3.152± | 2.24±  |
|            | (SSP2-4.5) | 0.974  | 0.655  | 0.588  | 0.557  | 0.458  | 0.66   | 0.763  | 0.58   | 0.553  | 0.601  | 0.749  | 0.979  | 0.51   |
|            | 2021-2050  | 1.108± | 0.791± | 0.446± | 0.505± | 0.515± | 0.508± | 0.721± | 0.783± | 0.839± | 0.712± | 1.181± | 1.54±  | 0.804± |
|            | (SSP5-8.5) | 0.168  | 0.45   | 0.268  | 0.295  | 0.294  | 0.404  | 0.293  | 0.317  | 0.32   | 0.22   | 0.4    | 0.296  | 0.164  |

|    |                         |                 |                 |                 |                 |                 |                 |                 |                 |                 |                 |                 |                 |                 |
|----|-------------------------|-----------------|-----------------|-----------------|-----------------|-----------------|-----------------|-----------------|-----------------|-----------------|-----------------|-----------------|-----------------|-----------------|
|    | 2071-2100<br>(SSP5-8.5) | 5.406±<br>0.841 | 4.852±<br>0.654 | 4.365±<br>0.785 | 4.656±<br>1.02  | 4.269±<br>0.82  | 3.823±<br>1.033 | 4.008±<br>1.191 | 4.246±<br>1.349 | 4.551±<br>1.048 | 4.719±<br>1.299 | 5.692±<br>1.329 | 6.303±<br>1.409 | 4.741±<br>0.902 |
| YZ | 2021-2050<br>(SSP2-4.5) | 1.319±<br>0.358 | 0.942±<br>0.511 | 0.963±<br>0.488 | 1.246±<br>0.541 | 1.069±<br>0.441 | 0.88±<br>0.332  | 0.761±<br>0.214 | 0.858±<br>0.258 | 0.954±<br>0.37  | 0.735±<br>0.191 | 1.236±<br>0.437 | 1.564±<br>0.576 | 1.044±<br>0.259 |
|    | 2071-2100<br>(SSP2-4.5) | 3.064±<br>0.933 | 2.818±<br>0.641 | 2.716±<br>0.519 | 3.026±<br>0.636 | 2.774±<br>0.688 | 2.409±<br>0.433 | 2.335±<br>0.506 | 2.37±<br>0.477  | 2.495±<br>0.594 | 2.424±<br>0.512 | 3.331±<br>0.991 | 3.658±<br>0.896 | 2.785±<br>0.465 |
|    | 2021-2050<br>(SSP5-8.5) | 1.501±<br>0.234 | 1.229±<br>0.512 | 1.159±<br>0.311 | 1.233±<br>0.348 | 1.043±<br>0.367 | 0.989±<br>0.344 | 0.992±<br>0.249 | 1.072±<br>0.278 | 1.132±<br>0.378 | 1.146±<br>0.192 | 1.69±<br>0.642  | 1.869±<br>0.396 | 1.254±<br>0.198 |
|    | 2071-2100<br>(SSP5-8.5) | 6.061±<br>0.768 | 5.628±<br>0.619 | 5.444±<br>0.793 | 5.712±<br>1.188 | 5.198±<br>0.955 | 4.55±<br>0.864  | 4.428±<br>1.088 | 4.624±<br>1.195 | 4.948±<br>1.048 | 5.388±<br>1.228 | 6.477±<br>1.537 | 6.79±<br>1.427  | 5.437±<br>0.846 |
